# Supplementary material for: Characterization of Microbial Shifts during the Production and Ripening of Raw Ewe Milk-Derived Idiazabal Cheese by High-Throughput Sequencing
Source: MDPI journal article supplement (doi:10.3390/biology11050769), 2022-05-18
Supplement: s1 [file s1]

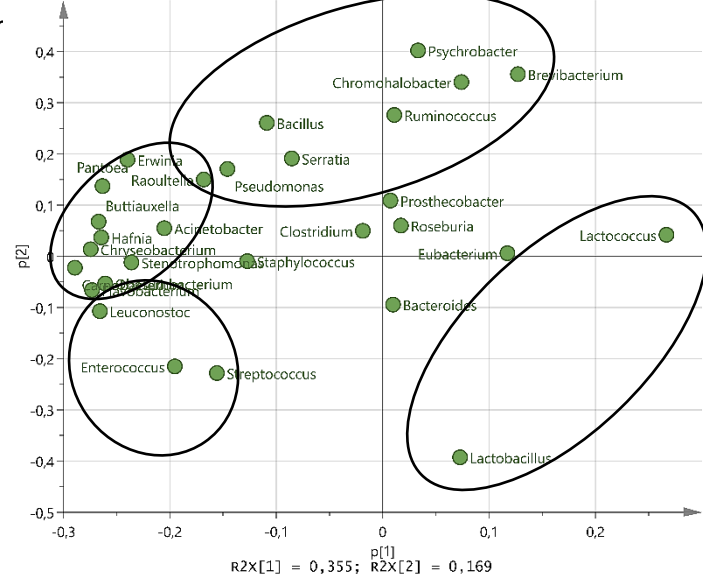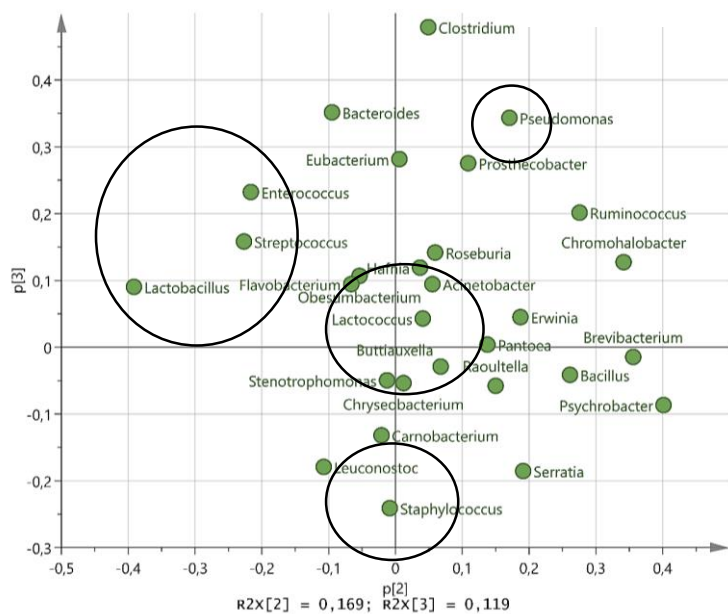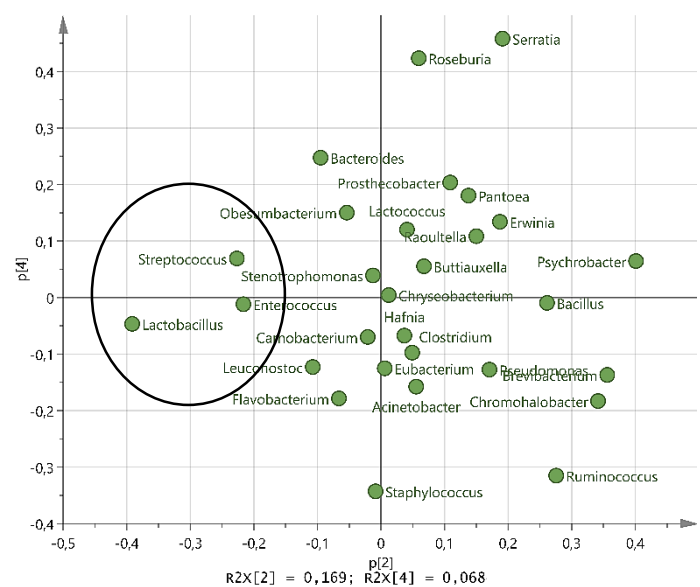

Figure S2. Scores and loadings plots of PCA based on main bacterial genera of Idiazabal cheeses from 4 producers (A, B, C and D). Samples are colored according to the producer and labels indicate samples identification.
