# Supplementary material for: Characterization of Microbial Shifts during the Production and Ripening of Raw Ewe Milk-Derived Idiazabal Cheese by High-Throughput Sequencing
Source: MDPI journal article supplement (doi:10.3390/biology11050769), 2022-05-18
Supplement: s1 [file s1]

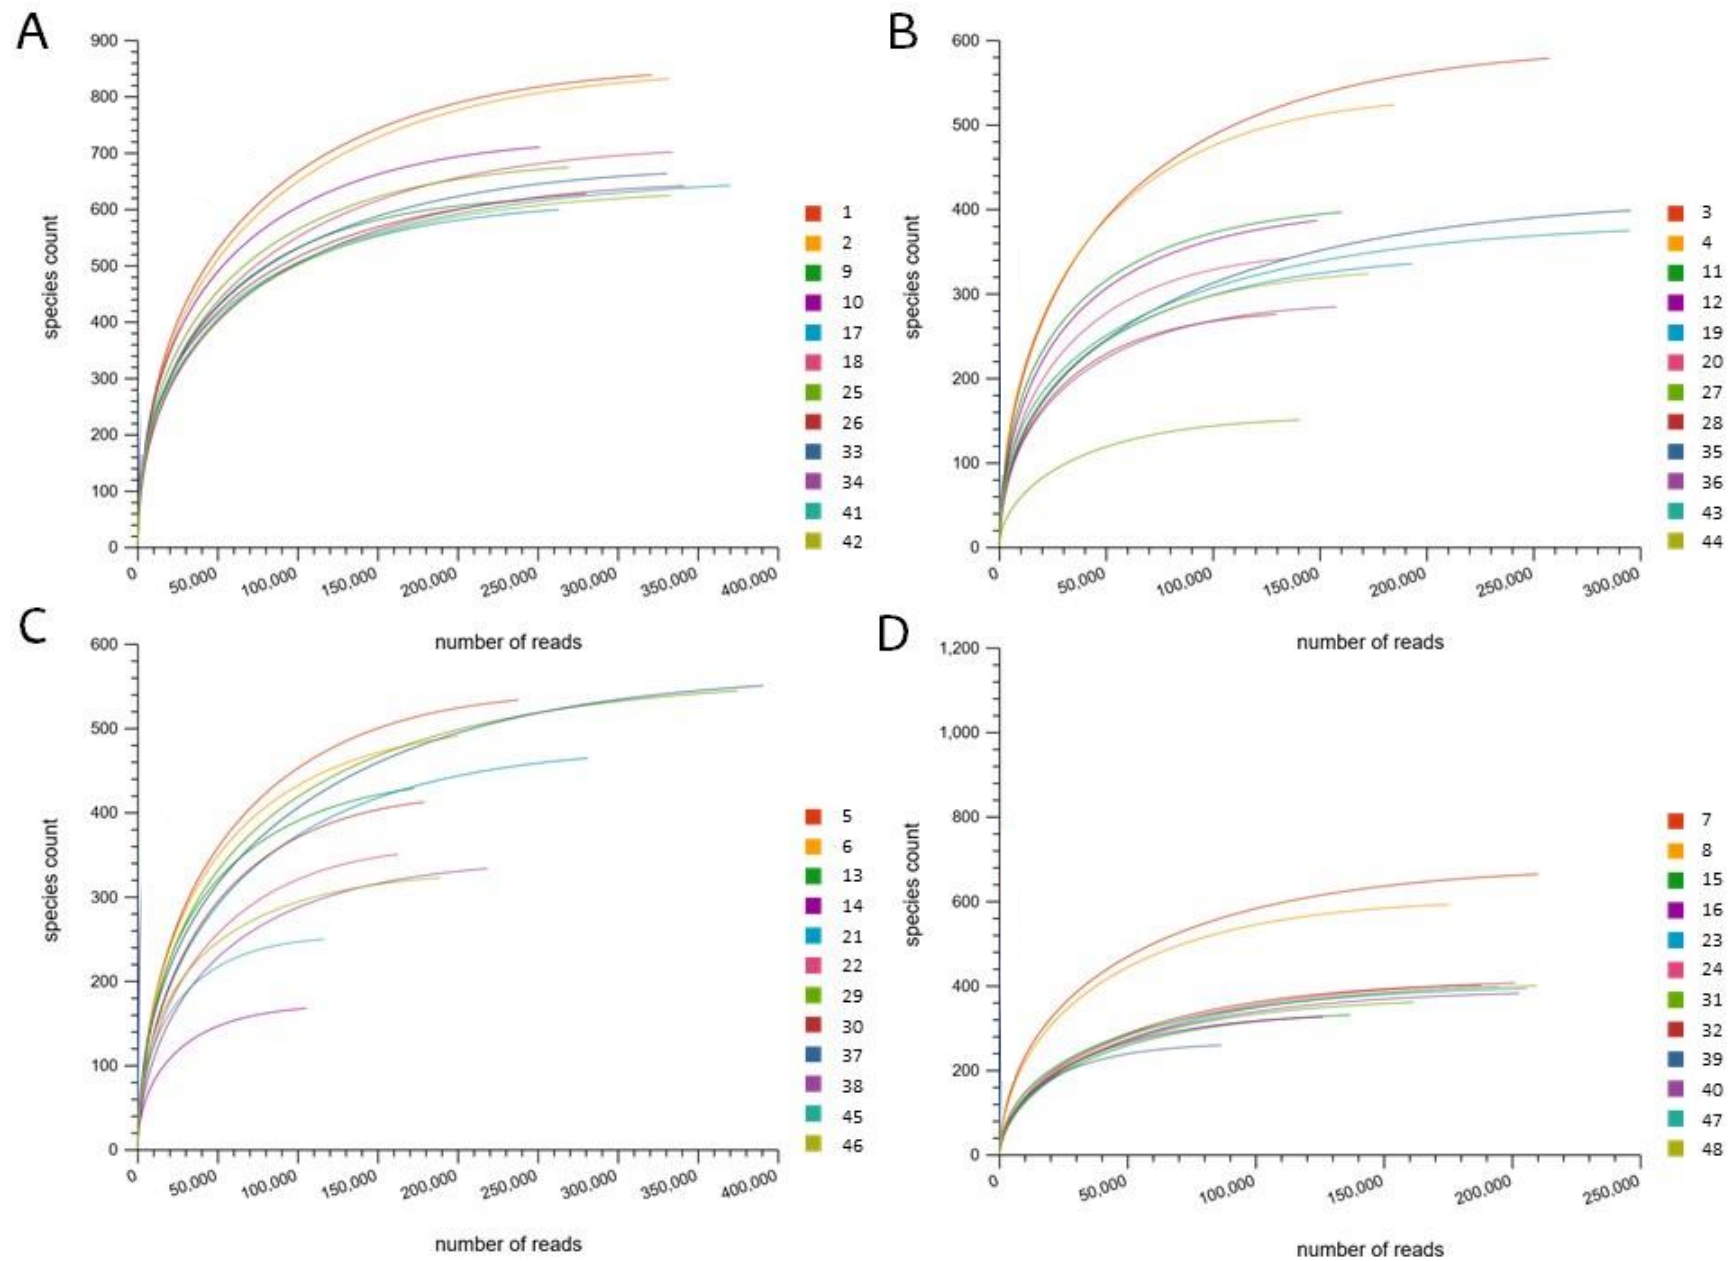

Figure S1. Rarefaction curves of microbial populations of the studied samples from each producer. Each graph represents a producer (A, B, C and D) and each line is colored according to the Sample ID.
