# Supplementary material for: Characterization of Microbial Shifts during the Production and Ripening of Raw Ewe Milk-Derived Idiazabal Cheese by High-Throughput Sequencing
Source: Biology (Basel). 2022 May 18;11(5):769. doi: 10.3390/biology11050769 (PMC9138791; doi:10.3390/biology11050769)
Supplement: Supplementary file 1 [file biology-11-00769-s001.zip › TablesS_HTS_Santamarina_2021.xlsx]

## Sheet: Supplementary Table S1
Supplementary Table S1. Mean and standard deviation of bacterial phyla of Latxa ewe raw milk and Idiazabal cheese samples at 6 ripening times (1, 7, 14, 30, 60 and 120 days) from 4 producers (A, B, C and D) (n = 52).
Producer	Milk/Cheese Ripening time (day)	Bacterial phyla
		Firmicutes			Proteobacteria			Bacteroidetes			Actinobacteria			Verrucomicrobia			Planctomycetes			Unclassified (derived from Bacteria)			Others1
A	Milk2	10.4829			32.6			5.57			0.975			2.34 × 10-2			4.68 × 10-2			50.3			1.34 × 10-2
	1	63.7126	±	1.19371	22.4	±	9.7	0.818	±	9.77 × 10-3	0.12	±	2.75 × 10-2	5.37 × 10-3	±	3.88 × 10-4	2.36 × 10-3	±	1.94 × 10-3	12.9	±	10.9	3.02 × 10-3	±	4.90 × 10-5
	7	68.9034	±	0.347383	20.1	±	9.25	0.466	±	1.73 × 10-2	0.82	±	1.04	6.56 × 10-4	±	2.91 × 10-4	4.31 × 10-4	±	6.09 × 10-4	9.72	±	7.84	3.52 × 10-3	±	1.11 × 10-4
	14	75.4202	±	10.2893	10.6	±	1.63	0.429	±	8.80 × 10-2	7.40 × 10-2	±	4.19 × 10-3	1.73 × 10-3	±	2.05 × 10-4	5.74 × 10-4	±	2.50 × 10-4	13.4	±	8.57	2.02 × 10-3	±	3.30 × 10-4
	30	80.9527	±	4.66472	5.6	±	0.926	0.668	±	0.222	9.33 × 10-2	±	1.17 × 10-2	6.96 × 10-4	±	6.04 × 10-4	ND			12.7	±	5.38	2.12 × 10-3	±	7.13 × 10-4
	60	90.5181	±	0.608118	4.26	±	2.03	0.76	±	0.176	0.109	±	1.07 × 10-2	1.85 × 10-3	±	1.77 × 10-3	2.99 × 10-4	±	4.23 × 10-4	4.34	±	2.45	4.25 × 10-3	±	1.19 × 10-3
	120	98.3074	±	0.311376	0.312	±	0.152	0.498	±	0.124	7.58 × 10-2	±	1.42 × 10-3	1.70 × 10-3	±	7.72 × 10-4	6.75 × 10-4	±	6.30 × 10-4	0.796	±	0.334	7.50 × 10-3	±	2.47 × 10-3
B	Milk2	37.2224			40.7			5.97			0.803			0.321			0.241			14.5			0.241
	1	72.8484	±	10.4534	5.85	±	4.93	1.90 × 10-2	±	2.82 × 10-3	2.67	±	0.344	1.90 × 10-3	±	1.98 × 10-3	4.37 × 10-3	±	1.58 × 10-3	18.6	±	5.86	1.15 × 10-3	±	8.50 × 10-4
	7	87.6354	±	11.6271	4.64	±	4.98	1.44 × 10-2	±	8.40 × 10-3	5.59	±	7.74	3.67 × 10-3	±	1.95 × 10-3	5.63 × 10-4	±	3.92 × 10-4	2.11	±	1.08	6.39 × 10-4	±	3.09 × 10-4
	14	89.5072	±	0.165726	4.96	±	2.2	2.85 × 10-2	±	5.52 × 10-3	2.41	±	1.12	5.76 × 10-4	±	2.52 × 10-4	3.27 × 10-3	±	7.00 × 10-4	3.09	±	1.25	1.37 × 10-3	±	8.71 × 10-4
	30	95.8121	±	2.01161	3.41	±	1.84	1.83 × 10-2	±	6.01 × 10-3	0.143	±	0.11	2.70 × 10-3	±	1.72 × 10-3	2.72 × 10-3	±	2.80 × 10-3	0.606	±	0.281	5.55 × 10-4	±	7.85 × 10-4
	60	97.5332	±	0.240653	1.17	±	0.928	1.80 × 10-2	±	7.22 × 10-3	0.21	±	2.94 × 10-2	1.21 × 10-3	±	1.70 × 10-3	2.25 × 10-3	±	7.19 × 10-4	1.06	±	1.19	1.03 × 10-3	±	9.72 × 10-4
	120	99.7014	±	0.1348	9.05 × 10-2	±	2.84 × 10-2	2.99 × 10-2	±	2.05 × 10-2	4.63 × 10-2	±	3.33 × 10-2	2.48 × 10-3	±	1.00 × 10-3	2.09 × 10-3	±	4.40 × 10-4	0.126	±	5.33 × 10-2	1.78 × 10-3	±	8.26 × 10-4
C	Milk2	54.0649			22			5.44			3.75			1.33			0.101			12.7			0.604
	1	94.6508	±	2.04947	3.38	±	0.883	6.79 × 10-2	±	2.12 × 10-3	0.683	±	0.538	2.82 × 10-3	±	3.96 × 10-4	1.39 × 10-3	±	1.17 × 10-3	1.21	±	0.629	2.74 × 10-3	±	1.17 × 10-4
	7	87.4441	±	10.3564	1.57	±	0.367	1.77 × 10-2	±	3.39 × 10-3	9.09	±	9.13	4.79 × 10-3	±	2.71 × 10-3	ND			1.87	±	0.859	1.44 × 10-3	±	2.03 × 10-3
	14	98.4109	±	9.40 × 10-3	0.757	±	2.27 × 10-2	1.04 × 10-2	±	1.08 × 10-3	0.552	±	4.83 × 10-2	4.25 × 10-3	±	2.71 × 10-3	1.02 × 10-3	±	9.04 × 10-4	0.263	±	1.95 × 10-2	1.01 × 10-3	±	4.83 × 10-4
	30	98.6855	±	0.42513	0.685	±	0.306	1.03 × 10-2	±	1.39 × 10-3	0.321	±	0.209	7.36 × 10-4	±	6.16 × 10-4	8.09 × 10-4	±	7.19 × 10-4	0.294	±	9.02 × 10-2	2.25 × 10-3	±	2.77 × 10-3
	60	98.8309	±	1.03138	0.286	±	0.207	8.86 × 10-3	±	5.92 × 10-3	0.592	±	0.631	7.42 × 10-4	±	6.88 × 10-4	3.79 × 10-4	±	1.88 × 10-4	0.279	±	0.186	1.65 × 10-3	±	1.29 × 10-3
	120	99.2237	±	0.162271	2.15 × 10-2	±	4.28 × 10-3	3.79 × 10-3	±	1.33 × 10-3	0.637	±	7.77 × 10-2	ND			1.01 × 10-3	±	5.88 × 10-4	0.113	±	7.90 × 10-2	4.44 × 10-4	±	6.27 × 10-4
D	Milk2	25.636			16.9			19.6			2.97			2.75			1.28			30			0.966
	1	86.2542	±	1.41043	2.61	±	1.08	0.238	±	5.02 × 10-2	0.756	±	3.30 × 10-2	2.32 × 10-2	±	1.99 × 10-3	3.55 × 10-2	±	4.55 × 10-3	10.1	±	0.309	7.76 × 10-3	±	3.96 × 10-3
	7	94.7245	±	0.129876	1.4	±	0.946	1.10 × 10-2	±	6.88 × 10-4	0.327	±	0.123	7.91 × 10-3	±	2.71 × 10-3	1.78 × 10-2	±	1.71 × 10-2	3.51	±	0.951	2.80 × 10-3	±	1.83 × 10-3
	14	95.9464	±	1.90669	1.38	±	1.02	2.07 × 10-2	±	2.66 × 10-3	0.175	±	1.31 × 10-2	7.67 × 10-3	±	2.85 × 10-3	1.20 × 10-2	±	1.16 × 10-3	2.45	±	0.874	6.90 × 10-3	±	2.49 × 10-3
	30	96.2614	±	0.523606	0.822	±	0.752	1.96 × 10-2	±	4.47 × 10-7	0.207	±	9.19 × 10-3	5.98 × 10-3	±	3.09 × 10-3	1.70 × 10-2	±	5.24 × 10-3	2.66	±	0.243	5.11 × 10-3	±	2.61 × 10-3
	60	96.5467	±	0.437538	0.298	±	0.144	2.35 × 10-2	±	4.26 × 10-3	0.288	±	9.93 × 10-4	5.48 × 10-3	±	1.22 × 10-3	2.26 × 10-2	±	1.20 × 10-2	2.81	±	0.311	1.97 × 10-3	±	2.10 × 10-3
	120	93.4027	±	4.21028	4.17 × 10-2	±	1.48 × 10-3	2.25 × 10-2	±	6.34 × 10-3	0.849	±	0.136	5.12 × 10-3	±	2.39 × 10-3	1.44 × 10-2	±	1.81 × 10-3	5.66	±	4.08	4.14 × 10-3	±	1.70 × 10-3
P-value3	C	**			*			**			NS			*			**			NS			**
	R	***			***			NS			*			NS			NS			*			NS
	P	*			**			***			**			***			***			***			***
1Those bacterial phyla that had an abundance lower than 1% were grouped as "Others".
2For milk only one sample was obtained per dairy, so only the corresponding relative abundance value (%) is displayed, with no mean or standard deviation.
3C: Cheese making factor effect; P: Producer factor effect; R: Ripening time factor effect
ND: Not detected; NS: P>0.05, *P≤0.05, **P≤0.01, ***P≤0.001

## Sheet: Supplementary Table S2
Supplementary Table S2. Mean and standard deviation of bacterial genera of Latxa ewe raw milk and Idiazabal cheese samples at 6 ripening times (1, 7, 14, 30, 60 and 120 days) from 4 producers (A, B, C and D) (n = 52).
Producer	Milk/Cheese Ripening time (day)	Bacterial genera
		Pseudomonas			Lactococcus			Buttiauxella			Chryseobacterium			Serratia			Eubacterium			Raoultella			Clostridium			Leuconostoc			Staphylococcus			Obesumbacterium			Bacillus			Pantoea			Stenotrophomonas			Bacteroides			Lactobacillus
A	Milk2	8.25			1.6382			14.1			3.21			0.123			7.66 × 10-2			0.127			0.183			0.636			5.48			3.37			0.263			2.12			0.183			0.103			3.66 × 10-2
	1	0.336	±	6.64 × 10-2	52.5275	±	1.36981	5.79	±	2.06	0.507	±	4.85 × 10-2	0.112	±	7.24 × 10-2	6.79 × 10-4	±	9.60 × 10-4	1.43	±	1.87	1.80 × 10-2	±	2.90 × 10-3	4.48	±	0.261	0.933	±	5.16 × 10-2	1.89	±	2.22	0.104	±	2.36 × 10-3	0.527	±	0.501	1.56 × 10-2	±	3.34 × 10-3	1.35 × 10-3	±	9.70 × 10-4	5.68 × 10-2	±	2.17 × 10-3
	7	0.237	±	2.33 × 10-2	58.4869	±	0.443777	3.84	±	5.34	0.309	±	2.38 × 10-2	0.166	±	0.158	4.30 × 10-4	±	6.09 × 10-4	2.95	±	4.11	1.11 × 10-2	±	5.56 × 10-3	2.1	±	3.28 × 10-2	1.14	±	0.255	3.03	±	3.53	0.313	±	0.303	0.342	±	5.84 × 10-3	4.68 × 10-3	±	3.57 × 10-3	2.86 × 10-3	±	2.21 × 10-4	5.06 × 10-2	±	1.51 × 10-3
	14	0.301	±	0.113	68.3241	±	11.7662	4.71 × 10-2	±	1.47 × 10-2	0.279	±	3.54 × 10-2	2.40 × 10-2	±	9.01 × 10-3	9.92 × 10-5	±	1.40 × 10-4	5.99 × 10-2	±	6.73 × 10-3	9.37 × 10-3	±	5.28 × 10-3	1.6	±	0.282	0.986	±	0.128	0.65	±	0.435	4.59 × 10-2	±	9.93 × 10-3	0.422	±	0.138	1.26 × 10-2	±	3.46 × 10-3	7.72 × 10-4	±	3.04 × 10-5	0.13	±	0.114
	30	9.73 × 10-2	±	4.17 × 10-3	69.3051	±	7.85435	0.457	±	0.579	0.53	±	0.249	2.72 × 10-2	±	1.23 × 10-3	1.20 × 10-3	±	9.43 × 10-4	3.32 × 10-2	±	2.61 × 10-2	1.63 × 10-2	±	9.30 × 10-3	4.53	±	1.37	1.71	±	0.105	1.29	±	1.57	6.63 × 10-2	±	2.11 × 10-2	8.09 × 10-2	±	2.96 × 10-2	6.63 × 10-3	±	3.55 × 10-3	1.66 × 10-3	±	1.83 × 10-3	0.53	±	0.478
	60	2.39 × 10-2	±	3.49 × 10-3	54.1505	±	1.31104	0.103	±	7.93 × 10-2	0.588	±	0.121	7.04 × 10-2	±	8.33 × 10-2	6.10 × 10-4	±	1.54 × 10-5	6.93 × 10-2	±	4.00 × 10-2	1.07 × 10-2	±	1.56 × 10-3	23.5	±	0.684	3.1	±	2.06	1.2	±	1.42	7.52 × 10-2	±	1.55 × 10-3	0.482	±	0.619	1.78 × 10-2	±	1.08 × 10-2	1.68 × 10-3	±	2.58 × 10-4	1.94	±	0.938
	120	7.61 × 10-3	±	5.88 × 10-3	45.3623	±	13.8519	2.46 × 10-2	±	3.34 × 10-2	0.367	±	7.35 × 10-2	1.75 × 10-3	±	1.49 × 10-3	8.80 × 10-4	±	5.64 × 10-5	3.55 × 10-2	±	5.03 × 10-2	8.45 × 10-3	±	3.50 × 10-3	31	±	8.31	6.78	±	1.83	5.20 × 10-2	±	6.40 × 10-2	0.113	±	2.16 × 10-2	1.05 × 10-2	±	7.35 × 10-3	1.38 × 10-2	±	3.52 × 10-3	6.50 × 10-4	±	2.69 × 10-4	6.89	±	1.22
B	Milk2	7.36			14.5412			0.473			2.58			12.6			0.789			6.86			1.89			6.1			4.1			0.21			1.58			5.26 × 10-2			0.526			0.973			1.34
	1	1.35 × 10-2	±	1.82 × 10-3	70.5378	±	11.2185	6.66 × 10-3	±	7.66 × 10-3	1.08 × 10-2	±	4.47 × 10-3	2.16	±	2.49	2.50 × 10-4	±	3.54 × 10-4	1.73 × 10-2	±	1.98 × 10-2	8.89 × 10-3	±	1.55 × 10-4	1.18 × 10-2	±	3.55 × 10-3	0.786	±	0.325	9.24 × 10-4	±	2.46 × 10-4	0.522	±	0.202	4.72 × 10-2	±	2.02 × 10-2	3.30 × 10-3	±	7.72 × 10-4	7.99 × 10-4	±	4.23 × 10-4	1.88 × 10-2	±	1.42 × 10-3
	7	9.66 × 10-3	±	2.99 × 10-3	82.4528	±	6.84179	3.76 × 10-3	±	4.19 × 10-3	1.43 × 10-2	±	8.95 × 10-3	0.812	±	0.934	1.67 × 10-3	±	1.80 × 10-3	3.27 × 10-2	±	4.06 × 10-2	4.31 × 10-3	±	1.04 × 10-3	0.17	±	2.13 × 10-2	0.745	±	0.585	2.10 × 10-4	±	2.97 × 10-4	0.305	±	0.171	9.32 × 10-3	±	3.67 × 10-3	1.63 × 10-3	±	6.57 × 10-5	ND			1.92 × 10-2	±	1.93 × 10-3
	14	5.87 × 10-3	±	2.24 × 10-4	90.7588	±	5.71085	0.115	±	0.158	1.79 × 10-2	±	8.77 × 10-3	2.34	±	2.88	7.14 × 10-4	±	1.01 × 10-3	8.93 × 10-2	±	0.121	4.02 × 10-3	±	2.85 × 10-3	6.74 × 10-2	±	7.84 × 10-2	0.761	±	0.258	1.70 × 10-3	±	7.91 × 10-4	4.39 × 10-2	±	8.31 × 10-3	2.71 × 10-2	±	2.14 × 10-2	1.00 × 10-3	±	1.41 × 10-3	8.97 × 10-4	±	8.64 × 10-4	0.253	±	0.334
	30	3.04 × 10-3	±	1.19 × 10-4	94.503	±	2.77926	ND	±	ND	1.52 × 10-2	±	8.28 × 10-3	3.05	±	1.61	7.61 × 10-4	±	2.97 × 10-5	3.06 × 10-2	±	3.99 × 10-2	8.11 × 10-3	±	6.23 × 10-3	3.33 × 10-2	±	2.93 × 10-2	0.667	±	0.152	5.76 × 10-4	±	2.91 × 10-4	6.43 × 10-2	±	1.19 × 10-2	6.34 × 10-3	±	3.20 × 10-3	9.46 × 10-4	±	2.32 × 10-4	1.34 × 10-3	±	3.21 × 10-4	6.39 × 10-2	±	4.12 × 10-2
	60	5.34 × 10-3	±	7.06 × 10-3	94.9983	±	1.51214	ND	±	ND	1.38 × 10-2	±	8.71 × 10-3	0.635	±	0.554	1.21 × 10-3	±	2.36 × 10-4	6.92 × 10-2	±	1.76 × 10-2	9.83 × 10-3	±	8.50 × 10-3	0.137	±	0.179	0.953	±	0.737	3.46 × 10-4	±	2.4e-06	4.81 × 10-2	±	1.19 × 10-2	8.51 × 10-3	±	8.13 × 10-3	8.63 × 10-4	±	7.28 × 10-4	2.43 × 10-3	±	2.46 × 10-3	0.683	±	2.98 × 10-2
	120	1.68 × 10-3	±	9.67 × 10-4	84.2552	±	5.4977	ND	±	ND	2.61 × 10-2	±	1.83 × 10-2	3.64 × 10-2	±	2.21 × 10-2	8.95 × 10-4	±	4.29 × 10-4	1.65 × 10-2	±	1.99 × 10-2	7.42 × 10-3	±	4.56 × 10-3	8.63 × 10-2	±	2.00 × 10-2	2.26	±	0.36	ND			7.69 × 10-2	±	2.26 × 10-2	1.29 × 10-3	±	6.90 × 10-4	2.58 × 10-3	±	5.38 × 10-4	1.88 × 10-3	±	1.53 × 10-3	12.21	±	4.78
C	Milk2	18.5			11.2307			0.024			ND			2.45 × 10-2			9.18			ND			6.09			ND			2.06			ND			2.15			ND			ND			1.69			2.32
	1	0.268	±	0.171	93.2295	±	2.60024	ND	±	ND	6.07 × 10-3	±	5.80 × 10-3	1.79 × 10-3	±	6.57 × 10-4	5.49 × 10-3	±	5.37 × 10-3	1.51 × 10-2	±	2.06 × 10-2	3.00 × 10-2	±	1.01 × 10-2	4.55 × 10-3	±	4.51 × 10-4	0.3	±	0.133	1.55 × 10-3	±	2.19 × 10-3	6.00 × 10-2	±	2.27 × 10-2	6.16 × 10-3	±	1.93 × 10-3	1.53 × 10-3	±	9.66 × 10-4	3.70 × 10-3	±	1.65 × 10-3	0.123	±	7.64 × 10-2
	7	0.136	±	1.42 × 10-2	84.9084	±	9.98712	ND	±	ND	4.21 × 10-3	±	4.60 × 10-3	2.87 × 10-4	±	4.06 × 10-4	7.47 × 10-3	±	9.74 × 10-3	3.06 × 10-3	±	1.08 × 10-3	3.97 × 10-2	±	1.69 × 10-2	1.91 × 10-3	±	1.35 × 10-3	1.34	±	1.137	4.79 × 10-4	±	6.77 × 10-4	0.126	±	3.10 × 10-2	1.72 × 10-3	±	2.44 × 10-3	7.66 × 10-4	±	2.71 × 10-4	1.34 × 10-3	±	5.42 × 10-4	0.251	±	0.191
	14	0.105	±	2.79 × 10-3	97.2321	±	0.159846	ND	±	ND	1.86 × 10-3	±	2.08 × 10-3	2.50 × 10-3	±	1.63 × 10-3	1.94 × 10-3	±	5.57 × 10-4	9.33 × 10-2	±	0.123	1.89 × 10-2	±	1.45 × 10-3	2.29 × 10-3	±	2.76 × 10-3	0.483	±	0.14	2.36 × 10-3	±	8.92 × 10-4	2.46 × 10-2	±	9.02 × 10-4	2.29 × 10-3	±	5.20 × 10-4	9.63 × 10-5	±	1.36 × 10-4	1.65 × 10-3	±	9.29 × 10-4	0.153	±	3.16 × 10-2
	30	4.21 × 10-2	±	1.02 × 10-2	95.7618	±	0.481519	7.32 × 10-5	±	1.04 × 10-4	2.24 × 10-3	±	1.93 × 10-3	7.40 × 10-4	±	1.96 × 10-4	2.28 × 10-3	±	2.37 × 10-3	0.132	±	0.182	1.62 × 10-2	±	6.73 × 10-3	7.72 × 10-3	±	5.59 × 10-4	0.554	±	0.135	1.26 × 10-3	±	3.37 × 10-4	3.01 × 10-2	±	6.90 × 10-3	1.62 × 10-3	±	1.44 × 10-3	5.97 × 10-4	±	4.30 × 10-4	1.18 × 10-3	±	3.98 × 10-4	1.67	±	0.141
	60	4.97 × 10-2	±	3.90 × 10-2	91.9914	±	7.25632	ND	±	ND	7.52 × 10-4	±	2.13 × 10-5	2.51 × 10-4	±	7.11 × 10-6	2.03 × 10-3	±	1.47 × 10-3	1.14 × 10-3	±	9.18 × 10-4	1.46 × 10-2	±	1.23 × 10-2	6.53 × 10-3	±	8.94 × 10-4	0.943	±	1.08	3.84 × 10-4	±	5.42 × 10-4	4.01 × 10-2	±	2.51 × 10-2	1.40 × 10-3	±	1.63 × 10-3	3.68 × 10-4	±	5.21 × 10-4	2.04 × 10-3	±	2.54 × 10-3	5.05	±	4.66
	120	1.45 × 10-3	±	3.96 × 10-5	91.7684	±	2.45756	ND	±	ND	1.48 × 10-4	±	2.09 × 10-4	ND	±	ND	1.36 × 10-3	±	5.84 × 10-4	2.37 × 10-4	±	3.35 × 10-4	6.66 × 10-3	±	6.06 × 10-3	1.16 × 10-2	±	5.72 × 10-3	0.312	±	9.50 × 10-2	4.74 × 10-4	±	6.71 × 10-4	3.61 × 10-2	±	8.78 × 10-3	ND	±	ND	4.74 × 10-4	±	6.71 × 10-4	1.51 × 10-3	±	7.93 × 10-4	6.44	±	2.18
D	Milk2	9.31			5.72206			ND			11.7			0.125			2.15			ND			5.23			5.44 × 10-3			0.291			0.299			1.38			5.17 × 10-2			1.97			1.2			0.884
	1	0.14	±	4.56 × 10-4	83.3465	±	0.674508	2.50 × 10-3	±	1.44 × 10-3	0.179	±	4.74 × 10-2	0.373	±	0.378	1.64 × 10-2	±	4.13 × 10-3	0.198	±	4.66 × 10-2	3.85 × 10-2	±	6.44 × 10-3	9.57 × 10-3	±	6.08 × 10-3	7.32 × 10-2	±	4.22 × 10-2	4.90 × 10-2	±	5.25 × 10-2	0.169	±	0.133	8.60 × 10-2	±	5.28 × 10-2	7.01 × 10-3	±	5.01 × 10-3	8.70 × 10-3	±	1.79 × 10-3	0.181	±	2.12 × 10-3
	7	6.96 × 10-2	±	4.97 × 10-2	93.066	±	5.42 × 10-2	4.09 × 10-4	±	5.79 × 10-4	2.35 × 10-3	±	1.48 × 10-4	4.61 × 10-2	±	2.59 × 10-2	5.01 × 10-3	±	2.45 × 10-3	3.58 × 10-3	±	1.88 × 10-3	1.75 × 10-2	±	2.77 × 10-3	2.79 × 10-3	±	1.83 × 10-3	6.16 × 10-2	±	7.74 × 10-3	5.72 × 10-2	±	5.89 × 10-2	6.27 × 10-2	±	8.78 × 10-3	1.74 × 10-2	±	5.51 × 10-3	3.74 × 10-4	±	5.29 × 10-4	2.76 × 10-3	±	7.26 × 10-4	0.357	±	7.95 × 10-4
	14	2.56 × 10-2	±	9.98 × 10-3	90.5608	±	1.44096	9.43 × 10-3	±	1.04 × 10-2	3.82 × 10-3	±	5.40 × 10-3	0.239	±	4.41 × 10-2	3.06 × 10-3	±	2.88 × 10-3	4.34 × 10-3	±	2.51 × 10-3	1.41 × 10-2	±	4.79 × 10-3	6.91 × 10-3	±	4.04 × 10-4	1.67	±	2.23	5.88 × 10-2	±	7.52 × 10-2	4.14 × 10-2	±	4.81 × 10-3	7.67 × 10-3	±	1.40 × 10-3	7.66 × 10-4	±	3.57 × 10-4	3.32 × 10-3	±	3.42 × 10-4	1.74	±	0.355
	30	4.72 × 10-2	±	4.09 × 10-2	92.0522	±	0.561165	3.62 × 10-2	±	4.94 × 10-2	5.97 × 10-3	±	3.09 × 10-3	1.14 × 10-2	±	3.69 × 10-5	3.98 × 10-3	±	2.06 × 10-3	3.11 × 10-2	±	4.21 × 10-2	1.81 × 10-2	±	5.11 × 10-3	1.39 × 10-2	±	2.70 × 10-3	0.102	±	8.19 × 10-3	2.27 × 10-2	±	2.68 × 10-2	4.45 × 10-2	±	2.32 × 10-3	7.27 × 10-3	±	4.71 × 10-4	3.43 × 10-3	±	4.08 × 10-3	4.15 × 10-3	±	1.26 × 10-3	2.34	±	0.169
	60	1.60 × 10-2	±	1.47 × 10-3	85.0092	±	1.79392	7.32 × 10-4	±	1.03 × 10-3	5.57 × 10-3	±	2.82 × 10-4	2.76 × 10-2	±	3.41 × 10-2	2.44 × 10-4	±	3.45 × 10-4	9.51 × 10-3	±	1.35 × 10-2	1.34 × 10-2	±	1.03 × 10-3	1.73 × 10-2	±	1.14 × 10-2	6.38 × 10-2	±	1.53 × 10-2	2.32 × 10-2	±	9.97 × 10-3	4.85 × 10-2	±	1.60 × 10-3	5.54 × 10-3	±	4.58 × 10-3	5.88 × 10-3	±	3.42 × 10-3	4.50 × 10-3	±	1.57 × 10-4	7.7	±	0.596
	120	5.38 × 10-3	±	2.79 × 10-3	76.5504	±	3.12695	ND			1.24 × 10-2	±	1.11 × 10-3	6.83 × 10-3	±	2.03 × 10-3	3.91 × 10-3	±	1.40 × 10-3	4.88 × 10-4	±	2.86 × 10-6	1.51 × 10-2	±	2.67 × 10-3	1.78 × 10-2	±	2.52 × 10-3	7.49 × 10-2	±	5.62 × 10-3	1.70 × 10-3	±	2.41 × 10-3	6.00 × 10-2	±	1.04 × 10-3	4.90 × 10-4	±	6.93 × 10-4	2.45 × 10-4	±	3.47 × 10-4	2.20 × 10-3	±	3.32 × 10-4	10.3	±	1.7
P-value3	C	**			**			NS			NS			NS			**			NS			**			NS			NS			NS			*			NS			NS			**			NS
	R	***			NS			NS			NS			NS			NS			NS			NS			NS			NS			NS			***			*			NS			NS			***
	P	***			***			***			***			***			**			**			**			***			***			***			*			***			***			**			*
1Those bacterial genera that had an abundance lower than 1% were grouped as "Others".
2For milk only one sample was obtained per dairy, so only the corresponding relative abundance value (%) is displayed, with no mean or standard deviation.
3C: Cheese making factor effect; P: Producer factor effect; R: Ripening time factor effect
ND: Not detected; NS: P>0.05, *P≤0.05, **P≤0.01, ***P≤0.001
[truncated: 45 more columns]

## Sheet: Supplementary Table S3
Supplementary Table S3. α-diversity indeces of Latxa Latxa ewe raw milk and Idiazabal cheese samples at 6 ripening times (1, 7, 14, 30, 60 and 120 days) from 4 producers (A, B, C and D) (n = 52).
Producer	Milk/Cheese Ripening time (day)	Sample ID	α-diversity indeces
			Chao1	ACE	Jevenness	Eevenness	Berger	Shannon	Simpson	Inverse Simpson
A	Milk	MA	296	316	0.382	0.0343	0.503	2.08	0.714	3.49
	1	1	399	380	0.305	0.0208	0.516	1.7	0.68	3.12
		2	365	380	0.322	0.023	0.535	1.79	0.675	3.08
	7	9	242	273	0.318	0.0279	0.588	1.67	0.632	2.71
		10	331	323	0.309	0.0242	0.582	1.66	0.629	2.69
	14	17	257	266	0.272	0.0222	0.6	1.42	0.593	2.46
		18	319	340	0.196	0.0128	0.767	1.06	0.402	1.67
	30	25	331	342	0.216	0.0152	0.749	1.15	0.428	1.75
		26	318	334	0.267	0.0205	0.638	1.42	0.561	2.28
	60	33	239	254	0.293	0.0244	0.532	1.54	0.651	2.87
		34	237	254	0.296	0.0245	0.551	1.56	0.639	2.77
	120	41	330	302	0.303	0.0251	0.369	1.6	0.721	3.59
		42	328	276	0.262	0.0214	0.552	1.36	0.624	2.66
B	Milk	MB	192	206	0.617	0.147	0.148	3.09	0.917	1.21
	1	3	266	276	0.158	0.0121	0.785	0.828	0.362	1.57
		4	255	245	0.243	0.0206	0.626	1.24	0.552	2.23
	7	11	204	202	0.182	0.0181	0.776	0.894	0.381	1.62
		12	168	176	0.13	0.015	0.873	0.628	0.234	1.31
	14	19	267	192	0.0634	0.0119	0.948	0.3	0.1	1.11
		20	184	188	0.144	0.0175	0.867	0.683	0.245	1.32
	30	27	99	125	0.05	0.0184	0.965	0.21	0.0689	1.07
		28	130	137	0.0865	0.0156	0.926	0.394	0.142	1.16
	60	35	249	227	0.0739	0.011	0.939	0.36	0.117	1.13
		36	142	154	0.0559	0.0137	0.961	0.254	0.0767	1.08
	120	43	156	183	0.101	0.0145	0.882	0.477	0.215	1.27
		44	172	197	0.143	0.0194	0.804	0.661	0.329	1.49
C	Milk	MC	194	185	0.65	0.175	0.191	3.24	0.916	1.19
	1	5	256	256	0.099	9.30 × 10-3	0.914	0.515	0.163	1.2
		6	213	221	0.0625	8.29 × 10-3	0.951	0.319	0.096	1.11
	7	13	249	216	0.172	0.016	0.779	0.856	0.371	1.59
		14	180	128	0.104	0.0219	0.92	0.442	0.153	1.18
	14	21	221	234	0.0402	7.40 × 10-3	0.971	0.205	0.0565	1.06
		22	212	180	0.0403	0.01	0.974	0.194	0.0521	1.06
	30	29	210	213	0.0566	7.49 × 10-3	0.954	0.293	0.0889	1.1
		30	240	211	0.0496	9.31 × 10-3	0.961	0.244	0.0759	1.08
	60	37	252	255	0.113	0.0101	0.869	0.589	0.238	1.31
		38	148	156	0.0375	0.0105	0.971	0.178	0.0563	1.06
	120	45	119	138	0.0711	0.0167	0.935	0.313	0.123	1.14
		46	115	130	0.0936	0.0171	0.9	0.42	0.183	1.22
D	Milk	MD	552	513	0.545	0.0645	0.3	3.28	0.877	8.15
	1	7	306	331	0.1	9.00 × 10-3	0.839	0.749	0.285	1.4
		8	300	299	0.1	0.0103	0.83	0.789	0.301	1.43
	7	15	201	217	0.0818	0.0115	0.931	0.397	0.133	1.15
		16	209	207	0.0772	0.0118	0.931	0.371	0.131	1.15
	14	23	301	232	0.11	0.012	0.896	0.544	0.196	1.24
		24	218	218	0.0922	0.0108	0.916	0.46	0.159	1.19
	30	31	182	202	0.0828	0.0116	0.925	0.402	0.142	1.17
		32	276	247	0.091	0.0108	0.918	0.453	0.157	1.19
	60	39	123	126	0.133	0.0198	0.863	0.601	0.249	1.33
		40	211	243	0.14	0.0143	0.838	0.689	0.29	1.41
	120	47	222	213	0.191	0.0197	0.744	0.931	0.425	1.74
		48	234	248	0.165	0.0165	0.788	0.808	0.364	1.57
